# Supplementary material
Source: publisher site journal article supplement (https://www.dovepress.com/article/321513)

**Supplementary Digital Content**

**Neutrophil extracellular traps augment alveolar macrophage pyroptosis via AIM2 inflammasome activation in LPS-induced ALI/ARDS**

Haitao Li1*; Yi Li2; Chao Song2; Yongbin Hu3; Minhui Dai2; Ben Liu4 ; Pinhua Pan2#

1.First Department of Thoracic Medicine, Hunan Cancer Hospital，the affiliated cancer hospital of xiangya school of medicine, central south university, Changsha 410008, P.R. China

2. Department of Respiratory and Critical Care Medicine, National Key Clinical Specialty, Xiangya Hospital, Central South University

2. Department of Pathology, Xiangya Hospital, Central South University, Changsha 410008, P.R. China

3.Department of Emergency, Xiangya Hospital, Central South University, Changsha 410008, P.R. China

*First Author, Email: leehaitao@csu.edu.cn

# Corresponding Author, E-mail: pinhuapan668@csu.edu.cn

**Supplementary Figures**

Figure 1 Elevated bronchial aspirate inflammatory cytokine levels in patients with ARDS caused by gram-negative bacterial pneumonia. (A) IL-1β levels were significantly increased in ARDS patients compared with healthy controls (*p*＜0.0001). There were also significant differences in IL-1β levels between patients with mild, moderate and severe ARDS (*p*＜0.05). Moreover, IL-1β levels were higher in non-survivors than in survivors (*p=0.0048). (B) IL-6 levels were found to be higher in ARDS patients than in healthy controls (p<0.001), but there was no significant difference in IL-6 levels between patients with mild, moderate and severe ARDS and between non-survivors and survivors (p>0.05). (C) IL-18 levels were higher in ARDS patients and non-survivors than in healthy controls and survivors, respectively (p<0.0001, p<0.05). (D) TNF-ɑ levels were found to be significantly increased in ARDS patients compared with healthy controls (p<0.0001). There was no difference in IL-10 levels between patients with moderate and severe ARDS or between survivors and non-survivors (p>0.05).


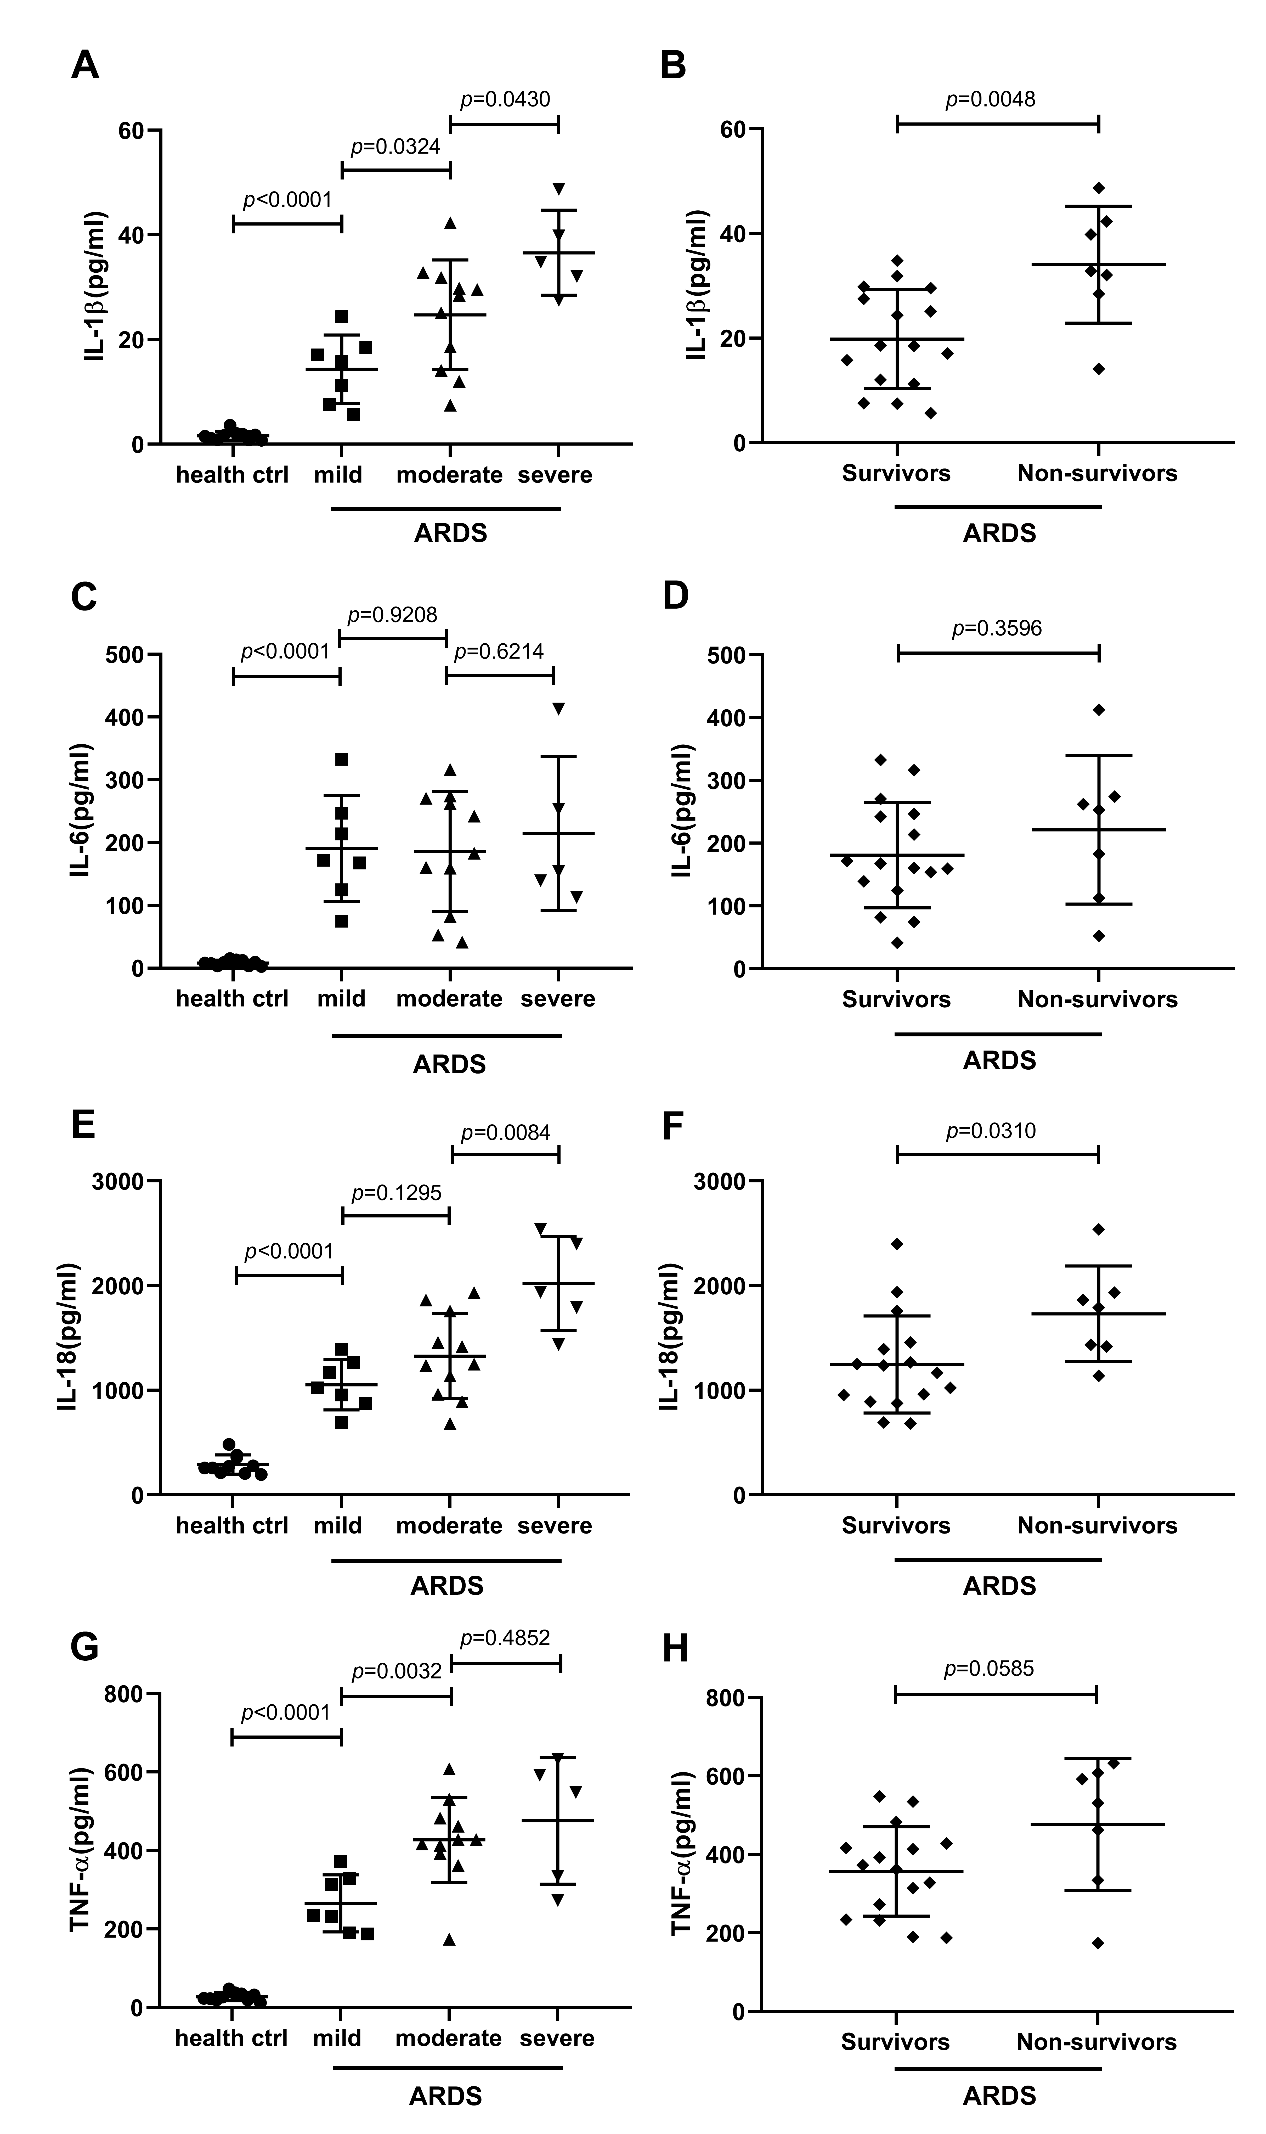


Figure 2 Inhibition of alveolar macrophage pyroptosis indirectly reduces NET content in the BALF of ARDS mice. (A) Administration of DNase I or BB-Cl-amidine did not alleviate neutrophil infiltration in the BALF of LPS-challenged mice, but Ac-YVAD-cmk alleviated neutrophil infiltration in BALF. ① Sham-treated mice, ② LPS-treated mice, ③ DNase I plus LPS-treated mice, ④ BB-Cl-amidine plus LPS-treated mice, and ⑤ Ac-YVAD plus LPS-treated mice. (B) Administration of DNase I or BB-Cl-amidine did not increase the macrophage number in the BALF of LPS-challenged mice, but Ac-YVAD-cmk increased the macrophage number in BALF. (C) Administration of DNase I, BB-Cl-amidine or Ac-YVAD reduced NET DNA content in the BALF of LPS-challenged mice. (D) The NET index in the Ac-YVAD-cmk plus LPS-treated group was comparable to that in the LPS-challenged group but decreased in the DNase I or BB-Cl-amidine plus LPS-treated group.


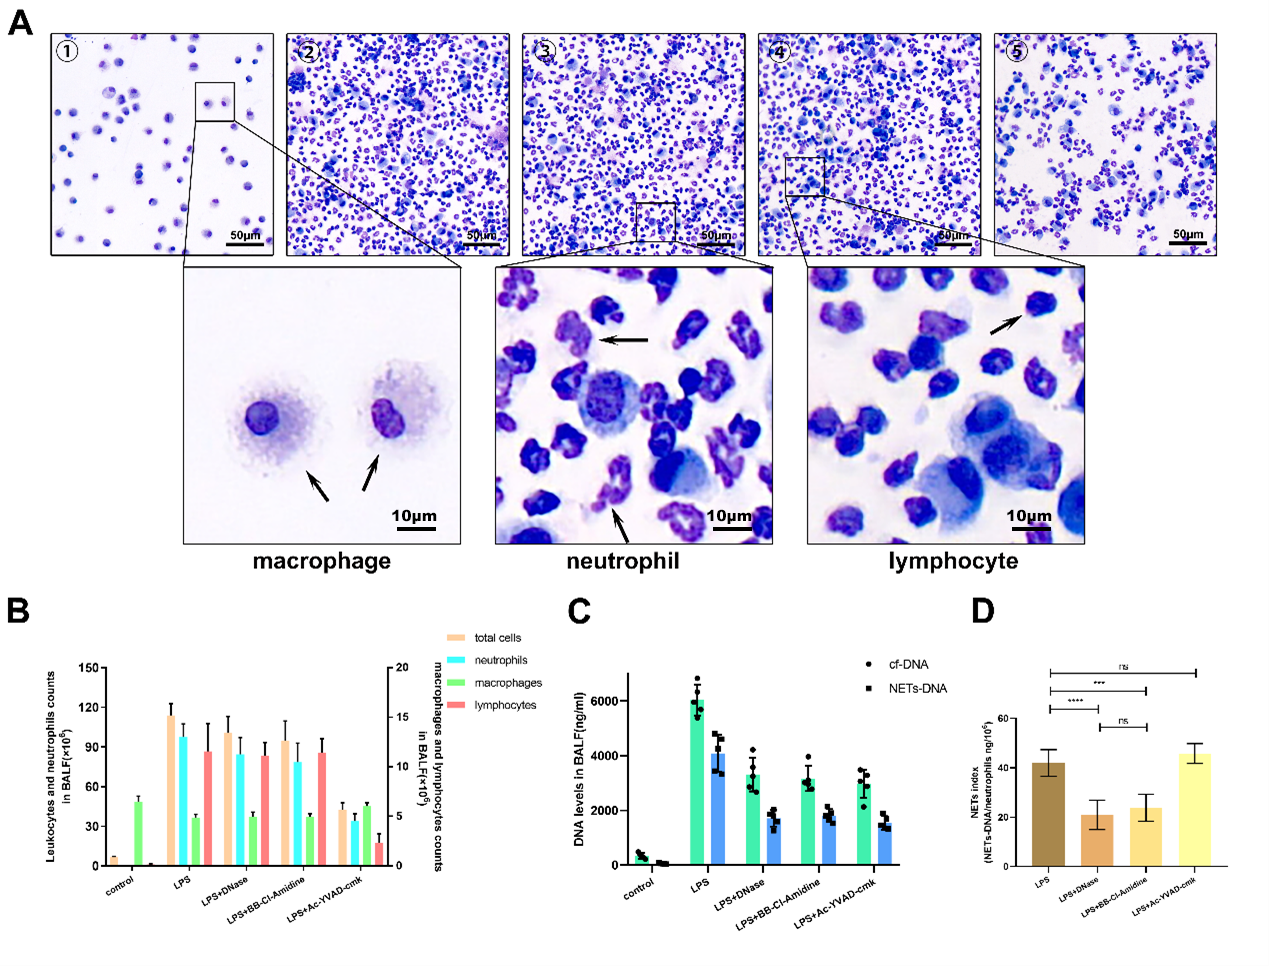


Figure 3 (A) PMA stimulation resulted in NET formation in neutrophils derived from human peripheral blood (an indicating arrow point to a neutrophil and a triangle arrow point to NETs formation). (B, C) Incubation with AIM2 siRNA resulted in a decline in AIM2 expression at the mRNA and protein levels.


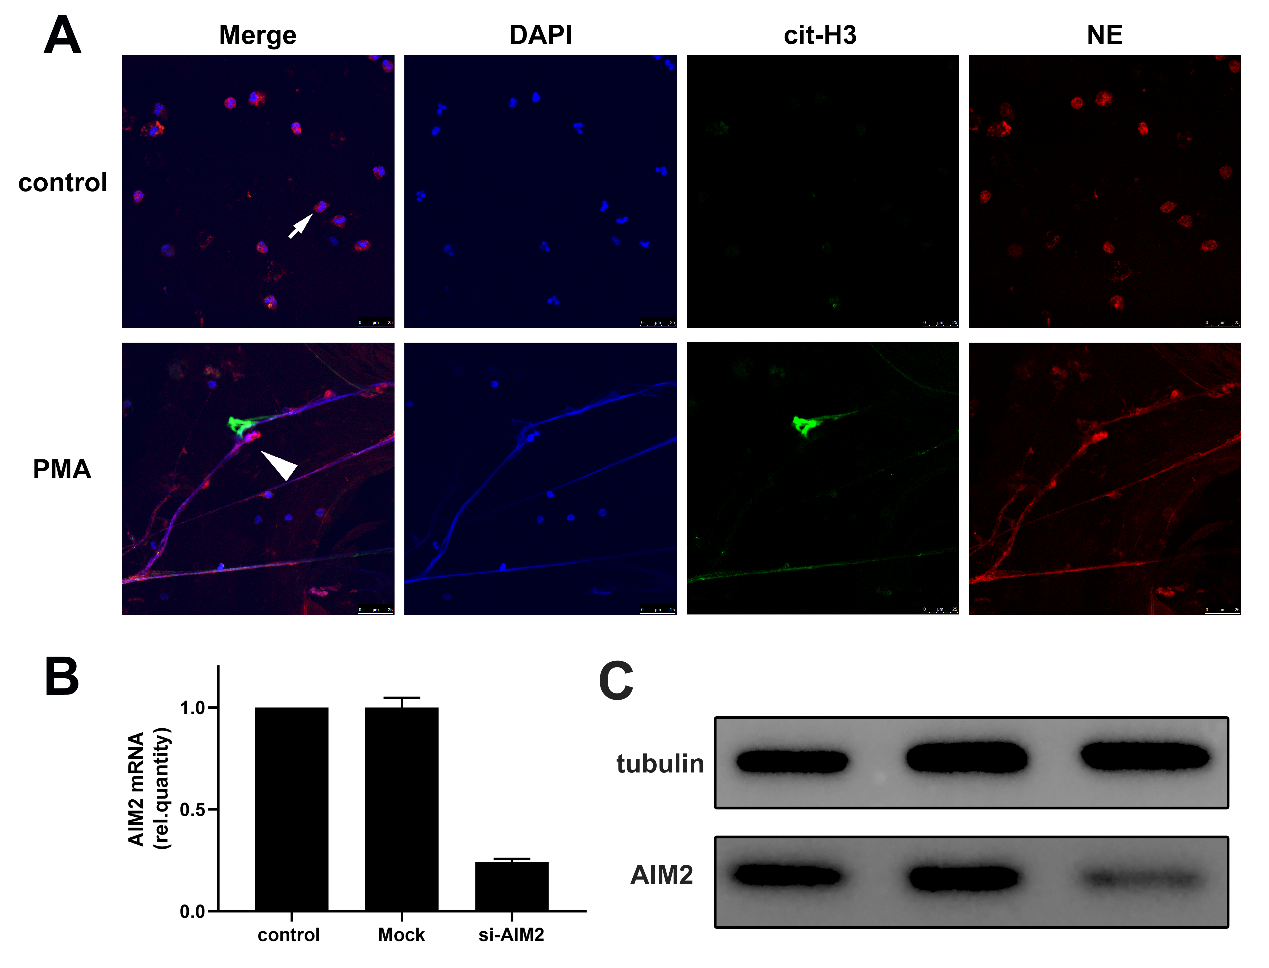

Supplement: Supplementary file 1 [file get_supplementary_file.php]
